# Supplementary material
Source: Springer Nature journal article supplement (https://www.springermedizin.de/resource/supplementary/12888_2013_1649_MOESM1_ESM.pdf/9481102)
Supplement: MOESM1 [file 9481102]

Students aged 14-18 present to school welfare staff and screened for suicidal ideation or suicide attempt within the last month.

School welfare staff obtains consent from the student and their parents, and refers to Reframe-IT study

Research assistant conducts baseline assessment at school

Participants are randomised into treatment & control groups by an independent statistician

Treatment group receive the Reframe-IT website over 10 weeks plus TAU

Control group receive TAU

Followed up at 10 and 22 weeks post-intervention

Followed up at 10 and 22 weeks post-intervention
